# Supplementary material
Source: MDPI journal article supplement (https://www.mdpi.com/2076-3417/10/9/3336)
Supplement: s1 [file s1]

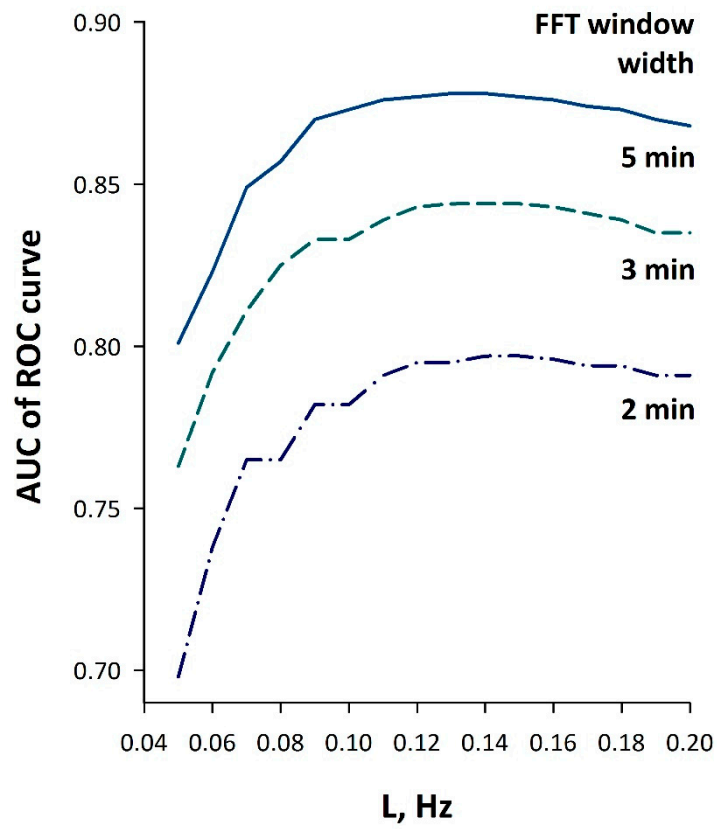

Figure S1: Effect of window width for calculating Hsi on the discriminant performance of NREM stage from wake and REM stages.
